# Supplementary material
Source: publisher figshare collection journal article supplement (https://frontiersin.figshare.com/ndownloader/files/31617497)
Supplement: Supplementary file 1 [file 31617497]

**Supplemental data for publication**

**Table 1: Cost of fruits and vegetables in surveyed stores and mobile food vendors**

|  | **Stores**  **(per 500 g)** | | | | **Mobile Food Vendors**  **(per 500 g)** | | | |
| --- | --- | --- | --- | --- | --- | --- | --- | --- |
| n | Mean | Min | Max | n | Mean | Min | Max |
| **FRUITS** |  |  |  |  |  |  |  |  |
| Apples green |  |  |  |  | 1 | 100.0 | 100.0 | 100.0 |
| Apples red | 1 | 124.5 | 124.5 | 124.5 | 2 | 87.5 | 75.0 | 100.0 |
| Banana | 3 | 61.3 | 40.0 | 100.0 | 2 | 45.0 | 40.0 | 50.0 |
| Cherry | 1 | 125.0 | 125.0 | 125.0 | 1 | 25.0 | 25.0 | 25.0 |
| Coconut (dry) |  |  |  |  | 1 | 30.0 | 30.0 | 30.0 |
| Coconut (green) | 1 | 34.2 | 34.2 | 34.2 |  |  |  |  |
| Dates | 1 | 140.0 | 140.0 | 140.0 |  |  |  |  |
| Green Grapes |  |  |  |  | 1 | 120.0 | 120.0 | 120.0 |
| Kiwi | 1 | 50.4 | 50.4 | 50.4 |  |  |  |  |
| Litchi |  |  |  |  | 1 | 50.0 | 50.0 | 50.0 |
| Malta |  |  |  |  | 1 | 50.0 | 50.0 | 50.0 |
| Mango | 1 | 20.0 | 20.0 | 20.0 |  |  |  |  |
| Mango chausa | 1 | 34.5 | 34.5 | 34.5 | 1 | 40.0 | 40.0 | 40.0 |
| Mango daseri | 2 | 35.4 | 15.7 | 55.0 | 1 | 25.0 | 25.0 | 25.0 |
| Mango green | 1 | 19.8 | 19.8 | 19.8 | 1 | 30.0 | 30.0 | 30.0 |
| Mango langda | 1 | 18.0 | 18.0 | 18.0 | 3 | 20.0 | 20.0 | 20.0 |
| Mango safeda | 2 | 32.9 | 15.7 | 50.0 | 1 | 30.0 | 30.0 | 30.0 |
| Mausami |  |  |  |  | 1 | 35.0 | 35.0 | 35.0 |
| Oranges | 1 | 44.1 | 44.1 | 44.1 |  |  |  |  |
| Papaya | 2 | 31.1 | 22.0 | 40.0 | 1 | 35.0 | 35.0 | 35.0 |
| Papaya green |  |  |  |  | 1 | 40.0 | 40.0 | 40.0 |
| Peaches | 1 | 55.0 | 55.0 | 55.0 |  |  |  |  |
| Pears |  |  |  |  | 1 | 75.0 | 75.0 | 75.0 |
| Pineapple | 1 | 49.5 | 49.5 | 49.5 |  |  |  |  |
| Plum | 1 | 62.5 | 62.5 | 62.5 | 1 | 60.0 | 60.0 | 60.0 |
| Pomegranate | 1 | 75.0 | 75.0 | 75.0 | 2 | 35.0 | 20.0 | 50.0 |
| Raw Mango | 1 | 44.0 | 44.0 | 44.0 |  |  |  |  |
| Sweet Melon |  |  |  |  | 1 | 40.0 | 40.0 | 40.0 |
| Tender coconut | 1 | 12.0 | 12.0 | 12.0 |  |  |  |  |
| Watermelon | 2 | 14.9 | 9.9 | 20.0 | 2 | 12.5 | 10.0 | 15.0 |
| **VEGETABLES** | | | | | | | | |
| American corn |  |  |  |  |  |  |  |  |
| Baby corn | 3 | 76.6 | 50.0 | 90.0 | 1 | 100.0 | - |  |
| Beans | 1 | 39.6 | - |  | 1 | 40.0 | - |  |
| Beans (flat) |  |  |  |  |  |  |  |  |
| Beetroot | 2 | 33.8 | 21.6 | 40.0 | 1 | 40.0 | - |  |
| Bell peppers | 1 | 240 | - |  | 1 | 160.0 | - |  |
| Bitter gourd | 1 | 24.5 | - |  | 1 | 30.0 | - |  |
| Bottle gourd | 4 | 21.7 | 17.1 | 30.0 | 1 | 30.0 |  |  |
| Eggplant | 3 | 22.9 | 17.1 | 30.0 | 1 | 40.0 |  |  |
| Broccoli |  |  |  |  | 1 | 160.0 | - |  |
| Cabbage | 2 | 15.7 | 8.55 | 23.0 |  |  |  |  |
| Canned Beans | 1 | 110.0 | - |  |  |  |  |  |
| Capsicum | 3 | 85.6 | 17.5 | 160.0 |  |  |  |  |
| Carrot | 2 | 26.9 | 16.2 | 40.0 |  |  |  |  |
| Cauliflower | 1 | 59.5 | - |  | 1 | 60.0 | - |  |
| Celery |  |  |  |  | 1 | 150.0 | - |  |
| Coriander | 4 | 67.5 | 38.2 | 89.5 |  |  |  |  |
| Corn seeds |  |  |  |  | 1 | 75.0 | - |  |
| Cucumber | 3 | 23.8 | 17.5 | 30.0 | 1 | 30.0 |  |  |
| Fenugreek leaves |  |  |  |  |  |  |  |  |
| French beans/scarlet runner | 1 | 44.5 | - |  | 1 | 100.0 | - |  |
| Garlic | 4 | 70.1 | 31.0 | 100.0 |  |  |  |  |
| Ginger | 4 | 71.0 | 59.5 | 100.0 |  |  |  |  |
| Green Chili | 3 | 65.5 | 31.0 | 100.0 | 1 | 100.0 |  |  |
| Ivy gourd | 1 | 44.6 | 29.5 | 60.0 |  |  |  |  |
| Jack fruit |  |  |  |  | 1 | 25.0 | - |  |
| Karela juice | 1 | 175.0 | - |  |  |  |  |  |
| Kundru | 1 | 29.5 | - |  |  |  |  |  |
| Lemon | 5 | 56.8 | 37.8 | 80.0 |  |  |  |  |
| Lettuce |  |  |  |  | 3 | 144.7 | 129.5 | 160.0 |
| Mint leaves | 1 | 39.5 | - |  | 1 | 25.0 | - |  |
| Mushroom |  |  |  |  | 1 | 25.0 | - |  |
| Mustard leaves |  |  |  |  | 1 | 25.0 | - |  |
| Okra | 4 | 27.4 | 9.9 | 40.0 |  |  |  |  |
| Onion | 3 | 43.1 | 9.45 | 100.0 |  |  |  |  |
| Parsley |  |  |  |  | 1 | 400.0 | - |  |
| Peas | 3 | 70.0 | 40.0 | 100.0 |  |  |  |  |
| Potato | 2 | 13.2 | 9.9 | 15.0 | 1 | 20.0 |  |  |
| Pumpkin | 3 | 13.7 | 6.75 | 20.0 | 1 | 20.0 |  |  |
| Radish | 1 | 20.0 | - |  |  |  |  |  |
| Ridged gourd | 2 | 24.0 | 18.0 | 30.0 |  |  |  |  |
| Spinach | 1 | 19.0 | - |  | 1 | 20.0 | - |  |
| Taro Roots | 3 | 31.1 | 24.7 | 40.0 | 1 | 30.0 |  |  |
| Tomatoes | 2 | 21.8 | 21.6 | 22.0 |  |  |  |  |
| Yam | 1 | 34.5 | - |  |  |  |  |  |
| Zucchini | 1 | 64.0 | - |  |  |  |  |  |

**Table 2: Cost of ultra-processed foods in surveyed stores, restaurants, and mobile food vendors**

| **Category** | **S.No.** | **Food Item** | **Stores** | | | | | **Restaurants** | | | | **Mobile Food Vendors** | | | |
| --- | --- | --- | --- | --- | --- | --- | --- | --- | --- | --- | --- | --- | --- | --- | --- |
| **n** | **Mean** | **Min** | **Max** | **n** | | **Mean** | **Min** | **Max** | **n** | **Mean** | **Min** | **Max** |
| **Cold Beverages (Aerated)** | 1 | Appy Fiz | 5 | 55 | 55 | 55 | . | | . | . | . | . | . | . | . |
| 2 | Coke | 6 | 45 | 35 | 80 | 2 | | 35 | 35 | 35 | . | . | . | . |
| 3 | Diet Coke | 9 | 28.3 | 20 | 30 | . | | . | . | . | . | . | . | . |
| 4 | Pepsi | 16 | 32.3 | 22.5 | 35 | . | | . | . | . | . | . | . | . |
| 5 | Fanta | . | . | . | . | . | | . | . | . | 1 | 35 | 35 | 35 |
| 6 | Soda | 3 | 41.6 | 40 | 45 | . | | . | . | . | . | . | . | . |
| **Cold Beverages**  **(Non-aerated)** | 7 | Frooti | 1 | 10 | 10 | 10 | . | | . | . | . | . | . | . | . |
| 8 | Green Apple Virgin Mojito | . | . | . | . | 1 | | 79 | 79 | 79 | . | . | . | . |
| 9 | Kala Khata Virgin Mojito | . | . | . | . | 1 | | 79 | 79 | 79 | . | . | . | . |
| 10 | Milkshake | 1 | 10 | 10 | 10 | . | | . | . | . | . | . | . | . |
| 11 | Mix Berry Smoothie | 1 | 80 | 50 | 100 | . | | . | . | . | . | . | . | . |
| 12 | Orange Virgin Mojito | . | . | . | . | 1 | | 79 | 79 | 79 | . | . | . | . |
| 13 | Lime Water (Shikanji) | 8 | 18 | 15 | 20 | . | | . | . | . | . | . | . | . |
| 14 | Flavored Milk | 3 | 100 | 80 | 135 | . | | . | . | . | . | . | . | . |
| 15 | Thandai | 2 | 178 | 146 | 210 | . | | . | . | . | . | . | . | . |
| 16 | Virgin Mojito | . | . | . | . | 1 | | 79 | 79 | 79 | . | . | . | . |
| 17 | Cold Coffee (Packaged) | 1 | 25 | 25 | 25 | . | | . | . | . | . | . | . | . |
| **Juice Drinks** | 18 | Mixed Fruit Juice | 22 | 50 | 40 | 60 | . | | . | . | . | . | . | . | . |
| 19 | Amla Juice | 1 | 100 | 100 | 100 | . | | . | . | . | . | . | . | . |
| 20 | Apple Juice | 6 | 40 | 40 | 40 | . | | . | . | . | . | . | . | . |
| 21 | Guava Juice | 4 | 70 | 50 | 110 | . | | . | . | . | . | . | . | . |
| 22 | Litchi Juice | 2 | 78.5 | 72 | 85 | . | | . | . | . | . | . | . | . |
| 23 | Mango | 1 | 100 | 100 | 100 | . | | . | . | . | . | . | . | . |
| 24 | Cranberry | 1 | 85 | 85 | 85 | . | | . | . | . | . | . | . | . |
| 25 | Orange | 9 | 77 | 72 | 85 | . | | . | . | . | . | . | . | . |
| 26 | Pineapple | 11 | 70 | 60 | 80 | . | | . | . | . | . | . | . | . |
| 27 | Aloe Vera Juice | 1 | 40 | 40 | 40 | . | | . | . | . | . | . | . | . |
| 28 | Giloy Juice | 1 | 40 | 40 | 40 | . | | . | . | . | . | . | . | . |
| **Bread** | 29 | Brown Bread | 1 | 60 | 60 | 60 | . | | . | . | . | . | . | . | . |
| 30 | Multigrain Bread | 12 | 44.3 | 25 | 56 | . | | . | . | . | . | . | . | . |
| 31 | Pizza Base | 4 | 29.3 | 27 | 30 | . | | . | . | . | . | . | . | . |
| 32 | Sweet Bun | 4 | 14.9 | 13.5 | 16 | . | | . | . | . | . | . | . | . |
| 33 | White Bread | 15 | 24 | 10 | 25 | . | | . | . | . | . | . | . | . |
| 34 | Wholegrain Bread | 15 | 22 | 10.5 | 30 | . | | . | . | . | . | . | . | . |
| **Sauces/syrups/dressings** | 35 | Roofaza Syrup (Sharbat) | 11 | 46 | 46 | 46 | . | | . | . | . | . | . | . | . |
| 36 | Dark Soy | 1 | 47 | 47 | 47 | . | | . | . | . | . | . | . | . |
| 37 | Green Chili | 1 | 175 | 175 | 175 | . | | . | . | . | . | . | . | . |
| 38 | Chocolate Syrup | 8 | 140.2 | 40.5 | 225 | . | | . | . | . | . | . | . | . |
| 39 | Mustard Sauce | 2 | 351.5 | 333 | 370 | . | | . | . | . | . | . | . | . |
| 40 | Nutella | 1 | 159 | 159 | 159 | . | | . | . | . | . | . | . | . |
| 41 | Nutty Caramel | 1 | 256 | 256 | 256 | . | | . | . | . | . | . | . | . |
| 42 | Imli Sauce | 1 | 42.4 | 42.3 | 42.3 | . | | . | . | . | . | . | . | . |
| 43 | Jam | 12 | 123.9 | 75 | 130 | . | | . | . | . | . | . | . | . |
| 44 | Southwest | 1 | 157.5 | 157.5 | 157.5 | . | | . | . | . | . | . | . | . |
| 45 | Mayonnaise | 15 | 121 | 98 | 237 | . | | . | . | . | . | . | . | . |
| 46 | Pasta/Pizza Sauce | 14 | 98 | 70 | 143.5 | . | | . | . | . | . | . | . | . |
| 47 | Peanut Butter | 10 | 143.8 | 40.5 | 370 | . | | . | . | . | . | . | . | . |
| 48 | Salad Dressing | 7 | 158 | 40.5 | 367 | . | | . | . | . | . | . | . | . |
| 49 | Tomato Ketchup | 18 | 137 | 40.5 | 310 | . | | . | . | . | . | . | . | . |
| **Snacks** | 50 | Stuffed Kulcha | . | . | . | . | . | | . | . | . | 1 | 60 | 60 | 60 |
| 51 | Paneer Patty | . | . | . | . | . | | . | . | . | 1 | 60 | 60 | 60 |
| 52 | Salted Peanuts | 4 | 42 | 30 | 100 | . | | . | . | . | . | . | . | . |
| 53 | Nachos | . | . | . | . | 2 | | 39.7 | 30 | 100 | . | . | . | . |
| 54 | Nachos with Chicken | . | . | . | . | 1 | | 200 | 200 | 200 | . | . | . | . |
| 55 | Popcorn | 6 | 9.8 | 9 | 10 | . | | . | . | . | . | . | . | . |
| 56 | Popcorn (Puffed) | 3 | 139.5 | 75 | 434.7 | . | | . | . | . | . | . | . | . |
| 57 | Roasted Channa | 12 | 5 | 5 | 5 | . | | . | . | . | . | . | . | . |
| 58 | Gol Gappe/Matthi* | . | . | . | . | . | | . | . | . | 1 | 10 | 10 | 10 |
| **Pizzas** | 59 | Cheese Pizza** | . | . | . | . | 1 | | 100 | 100 | 100 | . | . | . | . |
| 60 | Chicken Pizza** | . | . | . | . | 1 | | 165 | 165 | 165 | . | . | . | . |
| 61 | Mushroom Pizza** | . | . | . | . | . | | . | . | . | 1 | 140 | 140 | 140 |
| 62 | Mix Pizza** | . | . | . | . | . | | . | . | . | 1 | 120 | 120 | 120 |
| 63 | Onion Pizza** | . | . | . | . | . | | . | . | . | 1 | 120 | 120 | 120 |
| 64 | Paneer Pizza** | . | . | . | . | . | | . | . | . | 1 | 150 | 150 | 150 |
| 65 | Pizza Non Veg** | . | . | . | . | 1 | | 190 | 190 | 190 | . | . | . | . |
| 66 | Pizza Non Veg Treat** | . | . | . | . | 1 | | 145 | 145 | 145 | . | . | . | . |
| 67 | Pizza Simple Veg** | . | . | . | . | 1 | | 85 | 85 | 85 | . | . | . | . |
| 68 | Sweet Corn Pizza** | . | . | . | . | 1 | | 158.5 | 158.5 | 158.5 | . | . | . | . |
| 69 | Veg Treat Pizza** | . | . | . | . | 1 | | 145 | 145 | 145 | . | . | . | . |
|  | 70 | **Rolls (with Paneer)** | . | . | . | . | . | | . | . | . | 1 | 90 | 90 | 90 |
|  | 71 | **Burger** | . | . | . | . | 1 | | 25 | 25 | 25 | . | . | . | . |
| **Momos (with paneer)** | 72 | Paneer Momos (Steamed) | . | . | . | . | . | | . | . | . | 1 | 20 | 20 | 20 |
| 73 | Paneer Momos (Fried) | . | . | . | . | . | | . | . | . | 1 | 40 | 40 | 40 |
| 74 | Paneer Momos (Tandoori) | . | . | . | . | . | | . | . | . | 1 | 80 | 80 | 80 |
| **Chips** | 75 | Banana Chips | 2 | 30 | 30 | 30 | . | | . | . | . | . | . | . | . |
| 76 | Chocolate & Potato Chips | . | . | . | . | 1 | | 38.8 | 38.8 | 38.8 | . | . | . | . |
| 77 | Beetroot Chips | 1 | 75 | 75 | 75 | . | | . | . | . | . | . | . | . |
| 78 | Low Fat Potato Chips | 3 | 50 | 50 | 50 | . | | . | . | . | . | . | . | . |
| 79 | Okra Baked Chips | 1 | 30 | 30 | 30 | . | | . | . | . | . | . | . | . |
| 80 | Potato Chips | 22 | 15 | 10 | 20 | . | | . | . | . | . | . | . | . |
| 81 | Soya Chips | 1 | 12 | 12 | 12 | . | | . | . | . | . | . | . | . |
| 82 | Multigrain Chips | 2 | 42 | 34 | 50 | . | | . | . | . | . | . | . | . |
| 83 | Sabutdana Chips | 2 | 40 | 30 | 50 | . | | . | . | . | . | . | . | . |
| **Cookies** | 84 | Regular Cookies | 22 | 6 | 5 | 24 | . | | . | . | . | . | . | . | . |
| 85 | Low Fat Cookies | 10 | 16 | 10 | 30 | . | | . | . | . | . | . | . | . |
| 86 | Oatmeal Cookies | . | . | . | . | 1 | | 50 | 50 | 50 | . | . | . | . |
| 87 | Rusk | 13 | 10.9 | 10 | 12 | . | | . | . | . | . | . | . | . |
| 88 | Sugar-free Cookies | 5 | 25 | 20 | 40 | . | | . | . | . | . | . | . | . |
| 89 | Cheese Crackers | 4 | 10 | 10 | 10 | . | | . | . | . | . | . | . | . |
| **Indian Namkeen** | 90 | Butter Chakli | 1 | 90 | 90 | 90 | . | | . | . | . | . | . | . | . |
| 91 | Flavored Makhane | 4 | 424.1 | 391.5 | 435 | . | | . | . | . | . | . | . | . |
| 92 | Namkeen – Aloo Bhujia | 22 | 120.5 | 94 | 150 | . | | . | . | . | . | . | . | . |
| 93 | Namkeen – Plain Bhujia | 16 | 82 | 20 | 100 | . | | . | . | . | . | . | . | . |
| 94 | Namkeen – Moong Dal | 5 | 60 | 40 | 70 | . | | . | . | . | . | . | . | . |
| 95 | Namkeen – Diet Mix | 7 | 101 | 82 | 121 | . | | . | . | . | . | . | . | . |
| 96 | Bhelpuri | 10 | 110 | 41.8 | 120 | . | | . | . | . | . | . | . | . |
| 97 | Ragi Sticks | 4 | 80 | 30 | 90 | . | | . | . | . | . | . | . | . |
| **Chocolate/Protein Bars** | 98 | Chocolate Bar | 24 | 25 | 5 | 70 | . | | . | . | . | . | . | . | . |
| 99 | Candy/Toffee | 28 | 1.5 | 1 | 3 | . | | . | . | . | . | . | . | . |
| 100 | Protein Bar | 5 | 72 | 60 | 90 | . | | . | . | . | . | . | . | . |
| **Instant Cereals** | 101 | Chocos | 1 | 174 | 174 | 174 | . | | . | . | . | . | . | . | . |
| 102 | Cornflakes | 17 | 191.9 | 90 | 235 | . | | . | . | . | . | . | . | . |
| 103 | Low Fat Muesli | 2 | 222 | 180 | 264 | . | | . | . | . | . | . | . | . |
| 104 | Muesli | 11 | 232.8 | 118 | 290 | . | | . | . | . | . | . | . | . |
| 105 | Granola | 3 | 233.5 | 230 | 256 | . | | . | . | . | . | . | . | . |
| **Instant Ready to mix** | 106 | Atta Noodles | 2 | 40 | 40 | 40 | . | | . | . | . | . | . | . | . |
| 107 | Chicken Maggi | 5 | 19.6 | 18 | 19 | . | | . | . | . | . | . | . | . |
| 108 | Chicken Noodles | 5 | 62 | 40 | 70 | . | | . | . | . | . | . | . | . |
| 109 | Cuppa Noodles | 13 | 274 | 247.5 | 286 | . | | . | . | . | . | . | . | . |
| 110 | Diet Tofu | 1 | 45 | 45 | 45 | . | | . | . | . | . | . | . | . |
| 111 | Instant Soup Mix | 3 | 50 | 40 | 60 | . | | . | . | . | . | . | . | . |
| 112 | Instant Plain Maggi | 16 | 100.7 | 11 | 120 | . | | . | . | . | . | . | . | . |
| 113 | Instant Oats | 3 | 30 | 14 | 52 | . | | . | . | . | . | . | . | . |
| 114 | Instant Poha | 6 | 70 | 50 | 80 | . | | . | . | . | . | . | . | . |
| 115 | French Fries | 1 | 185 | 185 | 185 | . | | . | . | . | . | . | . | . |
| 116 | Smiley Fries | 4 | 180.4 | 166.5 | 185 | . | | . | . | . | . | . | . | . |
| 117 | Instant Dosa Mix | 7 | 55.1 | 43 | 60 | . | | . | . | . | . | . | . | . |
| 118 | Instant Idli Mix | 7 | 85 | 54 | 150 | . | | . | . | . | . | . | . | . |
| 119 | Instant Upma Mix | 2 | 120 | 120 | 120 | . | | . | . | . | . | . | . | . |
| 120 | Instant Dal Mix | 1 | 180 | 180 | 180 | . | | . | . | . | . | . | . | . |
| 121 | Tortilla Fajita Kit | 1 | 299 | 299 | 299 | . | | . | . | . | . | . | . | . |
| 122 | Taco Shells | 1 | 266 | 266 | 266 | . | | . | . | . | . | . | . | . |
| 123 | Oats Noodles | 1 | 45 | 45 | 45 | . | | . | . | . | . | . | . | . |
| 124 | Pan Cake Mix | 6 | 176.4 | 157 | 185 | . | | . | . | . | . | . | . | . |
| 125 | Instant Pasta Mix | 6 | 75 | 75 | 75 | . | | . | . | . | . | . | . | . |
| 126 | Wai Wai Noodles | 1 | 30 | 30 | 30 | . | | . | . | . | . | . | . | . |
| **Dairy Products (Cheese)** | 127 | Cheddar Cheese Block (Regular) | 2 | 83.6 | 79.2 | 88 | . | | . | . | . | . | . | . | . |
| 128 | Buttermilk | 5 | 14 | 10 | 20 | . | | . | . | . | . | . | . | . |
| 129 | Lassi (Sweet) | 1 | 15 | 15 | 15 | . | | . | . | . | . | . | . | . |
| 130 | Mozzarella String Cheese | 1 | 363 | 363 | 363 | . | | . | . | . | . | . | . | . |
| 131 | Paneer | 11 | 110 | 112.1 | 240 | . | | . | . | . | . | . | . | . |
| 132 | Regular Cheese Singles/Slices | 7 | 117 | 138 | 240 | . | | . | . | . | . | . | . | . |
| **Cooked Meals (including paneer, processed bread or noodles)** | 133 | Chole Kulche^ | . | . | . | . | . | | . | . | . | 1 | 20 | 20 | 20 |
| 134 | Fried Chicken$ | . | . | . | . | . | | . | . | . | 1 | 50 | 50 | 50 |
| 135 | Noodles (Veg) | . | . | . | . | 1 | | 250 | 250 | 250 | 1 | 90 | 90 | 90 |
| 136 | Chicken Noodles | . | . | . | . | . | | . | . | . | 1 | 120 | 120 | 120 |
| 137 | Chili Chicken Noodles | . | . | . | . | . | | . | . | . | 1 | 260 | 260 | 260 |
| 138 | Paneer Methi Malai | . | . | . | . | 1 | | 255 | 255 | 255 | . | . | . | . |
| 139 | Paneer Achari Kabab (Veg) | . | . | . | . | 1 | | 251 | 251 | 251 | . | . | . | . |
| 140 | Paneer Tikka Kabab (Veg) | . | . | . | . | 1 | | 251 | 251 | 251 | . | . | . | . |
| 141 | Veg Thukpa | . | . | . | . | 1 | | 135 | 135 | 135 | . | . | . | . |
| 142 | Palak Paneer | . | . | . | . | 1 | | 30 | 30 | 30 | . | . | . | . |
| 143 | Paneer Paratha and Curd | . | . | . | . | 1 | | 35 | 35 | 35 | . | . | . | . |
| 144 | Aloo Burger | . | . | . | . | 1 | | 25 | 25 | 25 | . | . | . | . |
| 145 | Paneer Pakoda | . | . | . | . | 1 | | 41 | 41 | 41 | . | . | . | . |
| 146 | Papad | . | . | . | . | 1 | | 6 | 6 | 6 | . | . | . | . |
| **Desserts** | 147 | Ice-Cream – Belgian Chocolate | . | . | . | . | 1 | | 547.5 | 547.5 | 547.5 | . | . | . | . |
| 148 | Ice-Cream – Vanilla | . | . | . | . | 1 | | 597.5 | 597.5 | 597.5 | . | . | . | . |
| 149 | Blueberry Cheese Cake | . | . | . | . | 1 | | 647.5 | 647.5 | 647.5 | . | . | . | . |
| 150 | Caramelized Pineapple & Coconut | . | . | . | . | 1 | | 597.5 | 597.5 | 597.5 | . | . | . | . |
| 151 | Ice-Cream – Mango Mania | . | . | . | . | 1 | | 597.5 | 597.5 | 597.5 | . | . | . | . |
| 152 | Ice-Cream – Orange And Chocolate | . | . | . | . | 1 | | 647.5 | 647.5 | 647.5 | . | . | . | . |
| 153 | Peanut Butter Jelly | . | . | . | . | 1 | | 647.5 | 647.5 | 647.5 | . | . | . | . |
| 154 | Red Velvet Cake | . | . | . | . | 1 | | 745.5 | 745.5 | 745.5 | . | . | . | . |
| 155 | Tea Cake | 1 | 50 | 50 | 50 | . | | . | . | . | . | . | . | . |
| 156 | Strawberry Shortcake | . | . | . | . | 1 | | 647.5 | 647.5 | 647.5 | . | . | . | . |
| *The gol gappe/matthi were not prepared by the mobile street vendor. The vendor collected these from another vendor who sold these on a bigger scale.  **Prepared with either ultra-processed paneer (cottage cheese), cheese, or bread.  ^Processed bread was used for 'Kulche'.  $The vendor had a half cooked fried chicken in a big pack and he fried these when the dish was ordered by someone. | | | | | | | | | | | | | | | |

**Table 3: Cost of processed foods in surveyed restaurants and mobile food vendors**

| **Category** | **S.No.** | **Food Item** | **Restaurants** | | | | **Mobile Food Vendors** | | | | |
| --- | --- | --- | --- | --- | --- | --- | --- | --- | --- | --- | --- |
| **n** | **Mean** | **Min** | **Max** | **n** | **Mean** | **Min** | **Max** |
| **Appetizers** | 1 | Chana Masala | 1 | 30 | 30 | 30 | . | . | . | . |
| 2 | Chicken Kebab/Tikka | 1 | 495 | 295 | 695 | 2 | 100 | 100 | 100 |
| 3 | Soya Chaap Roll | . | . | . | . | 1 | 80 | 80 | 80 |
| 4 | Satin Soya Tikka | 1 | 225 | 225 | 225 | . | . | . | . |
| 5 | Soya Bean Chaap | 1 | 60 | 60 | 60 | . | . | . | . |
| 6 | Spicy Baked Chicken | 1 | 119 | 119 | 119 | . | . | . | . |
| 7 | Subz Aur Moong Phali Seekh | 1 | 241 | 241 | 241 | . | . | . | . |
| 8 | Tomato Soup | 1 | 40 | 40 | 40 | . | . | . | . |
| 9 | Veg Galauti Kebab | 1 | 225 | 225 | 225 | . | . | . | . |
| 10 | Bread Roll* | 1 | 24 | 24 | 24 | . | . | . | . |
| 11 | Murg Kalmi Kabab | 1 | 295 | 295 | 295 | . | . | . | . |
| **Breads** | 12 | Aloo Paratha | 1 | 20 | 20 | 20 | 1 | 15 | 15 | 15 |
| 13 | Gobhi Parantha | 1 | 50 | 50 | 50 | 1 | 40 | 40 | 40 |
| 14 | Laccha Parantha | 2 | 20.5 | 16 | 25 | 1 | 30 | 30 | 30 |
| 15 | Butter Roti | 1 | 30 | 30 | 30 | . | . | . | . |
| 16 | Garlic Bread Sticks* | 1 | 79 | 79 | 79 | . | . | . | . |
| 17 | Misi Roti | 2 | 40.5 | 10 | 52 | . | . | . | . |
| 18 | Naan | 1 | 50 | 50 | 50 | . | . | . | . |
| 19 | Pyaaz Paratha | 1 | 50 | 50 | 50 | 1 | 30 | 20 | 40 |
| 20 | Plain Roti | 2 | 12.5 | 5 | 20 | . | . | . | . |
| 21 | Butter Roti | 1 | 25 | 25 | 25 | . | . | . | . |
| 22 | Roti Mirch Vali | 1 | 30 | 30 | 30 | . | . | . | . |
| 23 | Rye Bread* | 1 | 80 | 80 | 80 | . | . | . | . |
| 24 | Tandoori Roti | 2 | 13.5 | 6 | 21 | . | . | . | . |
| **Butter/**  **sauces/**  **dressings** | 25 | Butter Spread | 1 | 20 | 20 | 20 | 1 | 10 | 10 | 10 |
| **Cooked Dish (South-Indian)** | 26 | Chili Masala Dosa | . | . | . | . | 1 | 70 | 70 | 70 |
| 27 | Garlic Masala Dosa | . | . | . | . | 1 | 70 | 70 | 70 |
| 28 | Masala Dosa | . | . | . | . | 1 | 50 | 50 | 50 |
| 29 | Mysore Masala Dosa | . | . | . | . | 1 | 70 | 70 | 70 |
| 30 | Onion Masala Dosa | . | . | . | . | 1 | 70 | 70 | 70 |
| 31 | Plain Dosa | . | . | . | . | 1 | 40 | 40 | 40 |
| 32 | Idli Sambhar | . | . | . | . | 1 | 30 | 30 | 30 |
| 33 | Uttapam Mix | . | . | . | . | 1 | 70 | 70 | 70 |
| 34 | Vada Sambhar | 1 | 95 | 95 | 95 | 1 | 30 | 30 | 30 |
| **Cooked Dish (rice)** | 35 | Egg Fried Rice | 1 | 240 | 240 | 240 | . | . | . | . |
| 36 | Chicken Fried Rice | . | . | . | . | 1 | 120 | 120 | 120 |
| 37 | Veg Fried Rice | 1 | 225 | 225 | 225 | 1 | 100 | 100 | 100 |
| 38 | Jeera/ Fried Rice | 1 | 80 | 80 | 80 | . | . | . | . |
| 39 | Plain Rice | 2 | 42.5 | 25 | 60 | . | . | . | . |
| **Cooked Dish (non veg curry)** | 40 | Egg Curry | 1 | 285 | 285 | 285 | 2 | 50 | 50 | 50 |
| 41 | Chicken Curry | 1 | 555 | 555 | 555 | 1 | 60 | 60 | 60 |
| 42 | Fish Curry | 1 | 375 | 375 | 375 | . | . | . | . |
| 43 | Goan Prawn Curry | 1 | 425 | 425 | 425 | . | . | . | . |
| **Cooked Meal (vegetable + rice)** | 44 | Kaddi Rice | 1 | 40 | 40 | 40 | 2 | 35 | 30 | 40 |
| 45 | Veg. Biryani | 3 | 212 | 129 | 295 | 1 | 30 | 30 | 30 |
| **Cooked Dish (lentils)** | 46 | Dal Fried | 2 | 73.5 | 30 | 117 | . | . | . | . |
| 47 | Dal Tadka | 2 | 47.5 | 35 | 60 | . | . | . | . |
| 48 | Dal-E- Khas | 1 | 235 | 235 | 235 | . | . | . | . |
| 49 | Rajma | 1 | 130 | 130 | 130 | . | . | . | . |
| **Cooked Dish (lentil + rice)** | 50 | Rajma Rice | 1 | 40 | 40 | 40 | 1 | 40 | 40 | 40 |
| **Cooked Meal (legume + rice)** | 51 | Chole Rice | 1 | 40 | 40 | 40 | 1 | 35 | 30 | 40 |
| **Cooked Meal (legume + bread)** | 52 | Chole Bhature | 2 | 77 | 30 | 124 | 3 | 24.5 | 20 | 30 |
| 53 | Chole Naan | . | . | . | . | 1 | 30 | 30 | 30 |
| **Cooked Meal (meat + rice)** | 54 | Chicken Rice | 1 | 275 | 275 | 275 | . | . | . | . |
| **Cooked Dish (Other)** | 55 | Pasta* | 1 | 275 | 275 | 275 | . | . | . | . |
| 56 | Veg Manchurian | 1 | 250 | 250 | 250 | 1 | 170 | 170 | 170 |
| **Cooked Dish (Noodles)** | 57 | Veg Noodles* | 2 | 250 | 250 | 250 | . | . | . | . |
| 58 | Chicken Noodles* | 1 | 300 | 300 | 300 | . | . | . | . |
| 59 | Chili Chicken Noodles* | 1 | 325 | 325 | 325 | . | . | . | . |
| **Cooked Meal (Platter/*thali)*** | 60 | Regular Thali | 1 | 178 | 178 | 178 | . | . | . | . |
| 61 | Special Thali | 3 | 148.3 | 70 | 195 | . | . | . | . |
| 62 | Thali Super Delux | 1 | 225 | 225 | 225 | . | . | . | . |
| 63 | Combo-I | 1 | 70 | 70 | 70 | . | . | . | . |
| 64 | Combo-II | 1 | 100 | 100 | 100 | . | . | . | . |
| 65 | Economic Thali | 2 | 95 | 50 | 140 | . | . | . | . |
| 66 | Non. Veg Thali | 1 | 225 | 225 | 225 | . | . | . | . |
| **Cooked Meal (vegetable + bread)** | 67 | Aloo Poori | 1 | 95 | 95 | 95 | 1 | 30 | 30 | 30 |
| **Cooked Dishes (vegetable)** | 68 | Aloo Jeera | 1 | 100 | 100 | 100 | . | . | . | . |
| 69 | Bhindi | 1 | 100 | 100 | 100 | . | . | . | . |
| 70 | Kadi Pakoda | 1 | 100 | 100 | 100 | . | . | . | . |
| 71 | Mix. Veg | 1 | 30 | 30 | 30 | . | . | . | . |
| 72 | Palak Corn Mushroom | 1 | 255 | 255 | 255 | . | . | . | . |
| **Dairy and dairy products** | 73 | Namkeen Chanch | 1 | 45 | 45 | 45 | . | . | . | . |
| 74 | Boondi Raita | 1 | 70 | 70 | 70 | 1 | 10 | 10 | 10 |
| 75 | Masala Chach | 1 | 58 | 58 | 58 | . | . | . | . |
| **Desserts** | 76 | Aata Laddu | 1 | 200 | 200 | 200 | . | . | . | . |
| 77 | Besan Barfi | 1 | 210 | 210 | 210 | . | . | . | . |
| 78 | Boondi Laddu | 1 | 115 | 115 | 115 | . | . | . | . |
| 79 | Choco Lava Cake* | 1 | 69 | 69 | 69 | . | . | . | . |
| 80 | Gulab Jamun | 2 | 62.5 | 30 | 95 | . | . | . | . |
| 81 | Jalebi | 1 | 90 | 90 | 90 | 1 | 30 | 30 | 30 |
| 82 | Kheer | 1 | 70 | 70 | 70 | 1 | 40 | 40 | 40 |
| 83 | Milk Cake | 1 | 200 | 200 | 200 | . | . | . | . |
| 84 | Mousse Cake* | 1 | 65 | 65 | 65 | . | . | . | . |
| 85 | Nagaroe And Halwa | 1 | 95 | 95 | 95 | . | . | . | . |
| 86 | Patisha | 1 | 210 | 210 | 210 | . | . | . | . |
| 87 | Son Halwa | 1 | 231 | 231 | 231 | 1 | 60 | 60 | 60 |
| **Fast Food (Indian)** | 88 | Dal Kachodi† | 1 | 40 | 40 | 40 | 1 | 60 | 60 | 60 |
| 89 | Behl Puri† | . | . | . | . | 1 | 60 | 60 | 60 |
| 90 | Chicken Roll | 2 | 95 | 95 | 95 | 1 | 90 | 90 | 90 |
| 91 | Bread Pakora | . | . | . | . | 1 | 12 | 12 | 12 |
| 92 | Sev Puri | 1 | 44 | 44 | 44 | 1 | 60 | 60 | 60 |
| 93 | Matar Kachodi† | 1 | 30 | 30 | 30 | 1 | 25 | 25 | 25 |
| 94 | Papri Chaat† | 1 | 50 | 50 | 50 | 1 | 60 | 60 | 60 |
| 95 | Peanut Chaat Masala | 1 | 165 | 165 | 165 | . | . | . | . |
| 96 | Kachori Sabzi | . | . | . | . | 1 | 25 | 25 | 25 |
| 97 | Samosa Chatni | 1 | 40 | 40 | 40 | 1 | 30 | 30 | 30 |
| 98 | Chicken Nuggets† | 1 | 115 | 115 | 115 | . | . | . | . |
| 99 | Chili Potato | 1 | 200 | 200 | 200 | 1 | 160 | 160 | 160 |
| 100 | Chicken Strips | 1 | 295 | 295 | 295 | . | . | . | . |
| **Fast Food** | 101 | Chicken Thukpa | 1 | 145 | 145 | 145 | . | . | . | . |
| 102 | Chicken Wings | 1 | 225 | 225 | 225 | . | . | . | . |
| 103 | Chili Hot Dogs* | 1 | 325 | 325 | 325 | . | . | . | . |
| 104 | French Fries | 3 | 121.7 | 75 | 165 | 1 | 120 | 120 | 120 |
| 105 | Hot Dog* | 1 | 325 | 325 | 325 | . | . | . | . |
| 106 | Egg Chicken Roll | 1 | 90 | 90 | 90 | 1 | 110 | 110 | 110 |
| 107 | Egg Roll | 2 | 47.5 | 30 | 65 | 1 | 50 | 50 | 50 |
| 108 | Veg Roll | 1 | 45 | 45 | 45 | 1 | 40 | 40 | 40 |
| 109 | Veg Khathi Roll | 1 | 165 | 165 | 165 | 1 | 60 | 60 | 60 |
| 110 | Spring Roll | 1 | 101 | 101 | 101 | 1 | 20 | 20 | 20 |
| 111 | Popcorn Overload | 1 | 747.5 | 747.5 | 747.5 | . | . | . | . |
| 112 | Baked Momo Augratin Non Veg | 1 | 209 | 209 | 209 | . | . | . | . |
| 113 | Baked Momo Augratin Veg | 1 | 199 | 199 | 199 | . | . | . | . |
| 114 | Chicken Steamed Momos | 1 | 150 | 150 | 150 | 3 | 35 | 20 | 50 |
| 115 | Veg Steamed Momos | 1 | 100 | 100 | 100 | 2 | 50 | 40 | 60 |
| 116 | Veg Pan Fried Momos | 1 | 159 | 159 | 159 | 1 | 60 | 60 | 60 |
| 117 | Chicken Tandoori Momos | 1 | 209 | 209 | 209 | 1 | 80 | 80 | 80 |
| 118 | Chicken Fried Momos | 1 | 299 | 299 | 299 | 2 | 55 | 20 | 90 |
| *****Reported at one restaurant wherein all items marked were prepared at the restaurant itself and no processed or packaged products were used.  **†**Everything was prepared at the restaurant/mobile food vendor and no ultra-processed ingredients were used. | | | | | | | | | | | |
